# Supplementary material for: Novel cocrystals of gliclazide: characterization and evaluation
Source: Royal Society of Chemistry journal article supplement (doi:10.1039/c5ce02402a), 2016-01-01
Supplement: c5ce02402a1.pdf [file c5ce02402a1.pdf]

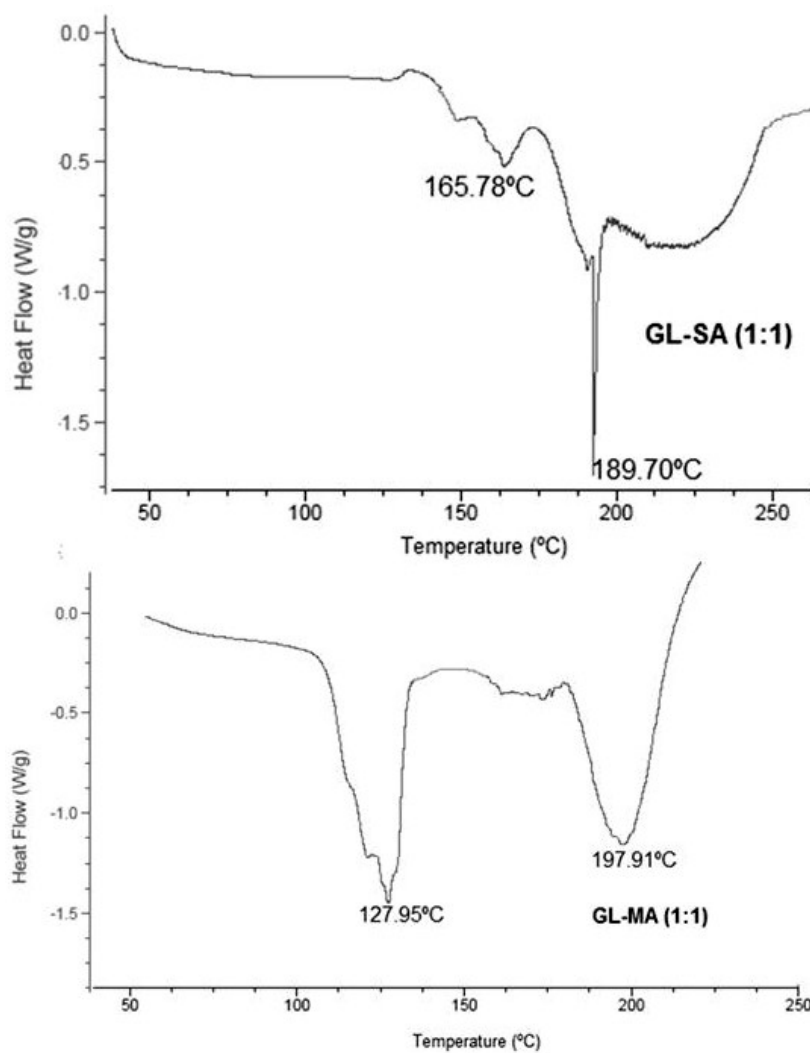

Figure S1 Physical Mixture of GL-SA and GL-MA

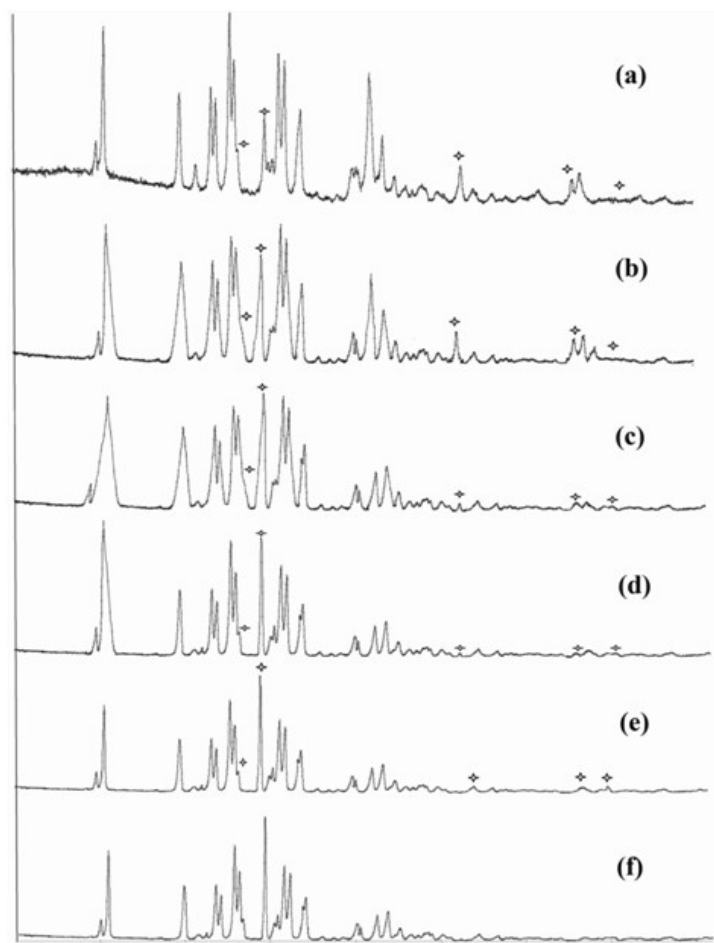

**Figure S2** From bottom to top: PXRD pattern of GL-SA (1:1) (f) physical mixture (e) after 1 min grinding (d) after 10 min grinding (c) after 20 min grinding (b) after 40 min grinding (a) after 60 min grinding

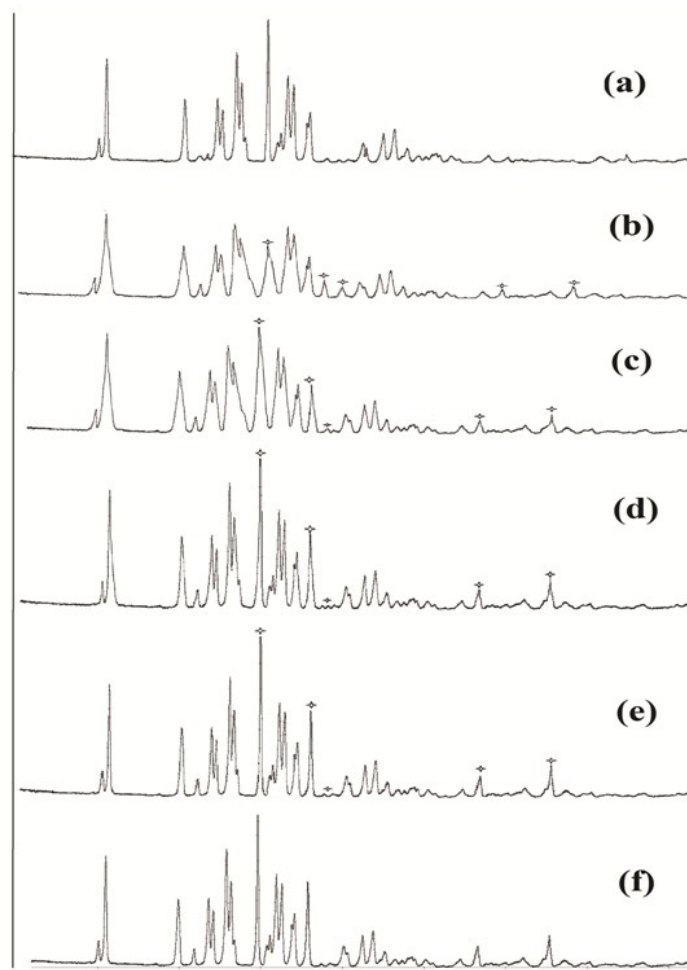

**Figure S3** From bottom to top: PXRD pattern of GL-MA (1:1) (f) physical mixture (e) after 1 min grinding (d) after 10 min grinding (c) after 20 min grinding (b) after 40 min grinding (a) after 60 min grinding
